# Supplementary material for: Primary Care Providers in California and Florida Report Low Confidence in Providing Type 1 Diabetes Care
Source: Oxford University Press journal article supplement (doi:10.2337/cd19-0060), 2020-02-27
Supplement: cd190060supplementarydata.pdf [file cd190060supplementarydata.pdf]

SUPPLEMENTARY DATA

**Primary Care Provider Survey about Patients with Type 1 Diabetes**

**I. Section One: Provider and Practice Demographics**

*This section of the survey contains general questions about the characteristics of your office location and the patient populations that you serve. Please provide your “best estimate” if you do not know the exact numbers of counts or percentages to questions throughout the survey.*

1. Please provide your title, role, and responsibilities at this practice:  
 [example: Medical Doctor, responsible for primary care of patients]

| Title | Primary Responsibilities | Specialty (e.g. Family Practice) | Credentials | Years in Practice | Zip-Code of Office Location |
|-------|--------------------------|----------------------------------|-------------|-------------------|-----------------------------|
|       |                          |                                  |             |                   |                             |

2. Which of the following best describes this practice?

- Solo
- Multi-specialty group practice
- Single-specialty group practice
- Hospital (or hospital system owned practice)
- Other (Please describe) \_\_\_\_\_

3. Do you have multiple site locations for this practice?

- Yes → How Many? \_\_\_\_\_ \*For the remainder of the survey please provide details for your primary practice location
- No

4. How many providers are at this practice?

\_\_\_\_\_ Providers  
 \_\_\_\_\_ MD/DO  
 \_\_\_\_\_ Extenders (PA, NP)

5. On average, how many patients are seen at your primary practice location each week?

\_\_\_\_\_ patients

6. Please describe the approximate percentage of your patients by payer type:

| Type of Coverage                                         | % |
|----------------------------------------------------------|---|
| Private Health Insurance                                 |   |
| Public Health Insurance (Medicaid, CMS or CHIP programs) |   |
| Public Health Insurance, over age 65 (Medicare)          |   |
| Self-Pay                                                 |   |
| No Insurance                                             |   |
| Other                                                    |   |

7. What percent of patients at your practice are less than 21 years of age? \_\_\_\_\_ %

SUPPLEMENTARY DATA

8. Please list the approximate number of children (ages 0-21) who have a diagnosis of Type 1 Diabetes Mellitus (T1D) or Type 2 Diabetes Mellitus (T2D) at your practice:

| Diagnosis                                    | Number: |
|----------------------------------------------|---------|
| Children with Type 1 Diabetes Mellitus (T1D) |         |
| Children with Type 2 Diabetes Mellitus (T2D) |         |

9. Please list the approximate number of adults (ages >21) who have a diagnosis of Type 1 Diabetes Mellitus (T1D) or Type 2 Diabetes Mellitus (T2D) at your practice:

| Diagnosis                                  | Number: |
|--------------------------------------------|---------|
| Adults with Type 1 Diabetes Mellitus (T1D) |         |
| Adults with Type 2 Diabetes Mellitus (T2D) |         |

10. Of the pediatric patients with Type 1 Diabetes at your practice (ages 0-21), what percent are seen by pediatric endocrinologists for routine care (multiple visits per year)?

\_\_\_\_\_ %

- Unsure
- Not applicable

11. Of the adult patients with Type 1 Diabetes at your practice (ages >21), what percent are seen by adult endocrinologists for routine care (multiple visits per year)?

\_\_\_\_\_ %

- Unsure
- Not applicable

12. Does your practice currently participate in any type of telemedicine programs?

- No
- Yes [Please describe in the space provided]:

---

---

**II. Section Two: Type 1 Diabetes Care**

*This section of the surveys asks questions about care delivery for patients with Type 1 Diabetes. If your location does not currently serve patients with Type 1 Diabetes, please complete the questions to the best of your ability, anticipating what it would be like if you did have a patient with Type 1 Diabetes.*

13. For your **pediatric** (ages 0-21) patients with Type 1 Diabetes, please check all of the protocols you follow (check all that apply):

- Not applicable, because we have no pediatric patient with a diagnosis of Type 1 Diabetes in our clinics (please go to question 14)
  - We refer patients with Type 1 Diabetes to pediatric endocrinologists for all their diabetes care
  - We refer patients with Type 1 Diabetes to pediatric endocrinologists only when their diabetes is difficult to manage
  - We test our patients' HbA1c levels who have Type 1 Diabetes
  - ✓ **IF Yes, how often do you check their HbA1c levels:**
  - We test HbA1c each clinic visit (well or sick visit)
  - We test HbA1c only when there is a problem or need that arises with diabetes
  - We review blood glucose monitoring with our Type 1 Diabetes patients
  - We prescribe blood glucose meters and strips for our patients with Type 1 Diabetes
  - We prescribe continuous glucose monitoring (CGM) for our patients with Type 1 Diabetes
  - We oversee and adjust insulin regimens for our patients with Type 1 Diabetes
  - We prescribe insulin for our patients with Type 1 Diabetes
  - We prescribe insulin pumps for our patients with Type 1 Diabetes
  - We provide diabetes education about ketones and diabetic ketoacidosis (DKA)
  - We screen our pediatric patients with Type 1 Diabetes for comorbidities
  - Other: Please describe what "other" protocols you follow:
- 

14. For your **adult** (ages >21) patients with Type 1 Diabetes, please check all of the protocols you follow (check all that apply):

- Not applicable, because we have no adult patient with a diagnosis of Type 1 Diabetes in our clinics (please go to question 15)
- We refer patients with Type 1 Diabetes to adult endocrinologists for all their diabetes care
- We refer patients with Type 1 Diabetes to adult endocrinologists only when their diabetes is more difficult to manage
- We test our adult patients' HbA1c levels who have Type 1 Diabetes
- ✓ **IF Yes, how often do you check their HbA1c levels:**
- We test HbA1c each clinic visit (well or sick visit)

SUPPLEMENTARY DATA

- We test HbA1c only when there is a problem or need that arises with diabetes
  - We review blood glucose monitoring with our adult Type 1 Diabetes patients
  - We prescribe blood glucose meters and strips for our patients with Type 1 Diabetes
  - We prescribe continuous glucose monitoring (CGM) for our patients with Type 1 Diabetes
  - We oversee and adjust insulin regimens for our adult patients with Type 1 Diabetes
  - We prescribe insulin for our patients with Type 1 Diabetes
  - We prescribe insulin pumps for our patients with Type 1 Diabetes
  - We provide diabetes education about ketones and diabetic ketoacidosis (DKA)
  - We screen our adult patients with Type 1 Diabetes for comorbidities
  - Other: Please describe what “other” protocols you follow:
- 

15. Can patients with Type 1 Diabetes get their insulin prescriptions from providers in your office?

- Yes
  - No [Please describe for either answer:]
- 

16. How many patients with Type 1 Diabetes have you written insulin prescriptions for in the past year?

\_\_\_\_\_ (number of patients)

- Not applicable

17. On average, what is the approximate driving distance (in miles) from your office to the endocrinologists you refer patients with Type 1 Diabetes to: [for example, **35 miles** away. Please provide a single # response.]

- Not applicable
- Pediatric** Endocrinologist: \_\_\_\_\_ miles away from my practice location
- Adult** Endocrinologist: \_\_\_\_\_ miles away from my practice location

18. Have you experienced any problems or issues in getting patients with Type 1 Diabetes referrals to endocrinology? (check all that apply)

- Not applicable
- No, I have not experienced any problems with endocrinology referrals
- Yes, we have a lack of endocrinologists in this geographic area:
- IF YES**, Please Circle (One or Both):      **ADULT**                      **PEDIATRIC**
- Yes, we have a lack of endocrinologists who are covered by our patients’ insurance plans
- Yes, we have experienced long wait times when trying to schedule our patients with endocrinologists

Other: Please describe other problems you have encountered in getting patients with Type 1 Diabetes referrals to endocrinology:

SUPPLEMENTARY DATA

---

---

19. Can you think of a situation where a patient with Type 1 Diabetes may prefer to receive their diabetes-related treatment at your practice rather than through a specialist like endocrinology? (check all that apply)

- No
  - Yes, Primary Care Providers can fully care for Type 1 Diabetes patients in our offices so there is no need for them to go see endocrinologists
  - Yes, it is more convenient for patients with Type 1 Diabetes to receive their diabetes-related care with their Primary Care Providers
  - Yes, my patients are not interested in going to see endocrinologists for care
  - Other: Please describe other reasons your patients with Type 1 Diabetes may prefer to receive their diabetes-related care at your practice:
- 
- 

20. Please describe examples of information or resources that would be most helpful to your practice in serving patients with Type 1 Diabetes: (check all that apply)

- Not applicable
  - Type 1 Diabetes education materials
  - Information about diabetes-related technologies like insulin pumps and continuous glucose monitors (CGMs)
  - Information about behavioral health services for my Type 1 Diabetes patients
  - Other: Please describe other resources that would be helpful in serving Type 1 Diabetes patients:
- 
-

SUPPLEMENTARY DATA

This section of questions concerns your confidence in managing patients with Type 1 Diabetes. For each statement, please check the box with your level of confidence.

| How confident are you in your ability to:                                                                                                                                                                                                                    | Not at all Confident | Somewhat Confident | Moderately Confident | Extremely Confident |
|--------------------------------------------------------------------------------------------------------------------------------------------------------------------------------------------------------------------------------------------------------------|----------------------|--------------------|----------------------|---------------------|
| 21. Manage patients with <u>Type 1 Diabetes</u> in your primary care setting?                                                                                                                                                                                |                      |                    |                      |                     |
| 22. Collect a diabetes-focused health history for patients with <u>Type 1 Diabetes</u> ?                                                                                                                                                                     |                      |                    |                      |                     |
| 23. Educate clinic staff about patients with <u>Type 1 Diabetes</u> ?                                                                                                                                                                                        |                      |                    |                      |                     |
| 24. Discuss complications related to <u>Type 1 Diabetes</u> and how to avoid them?                                                                                                                                                                           |                      |                    |                      |                     |
| 25. Identify social barriers for my patients with <u>Type 1 Diabetes</u> ? ( <i>Social barriers could include financial obstacles like lack of transportation for clinic visits or social support obstacles like lack of family or friendship networks</i> ) |                      |                    |                      |                     |
| 26. Provide appropriate interventions for overcoming social barriers for my patients with <u>Type 1 Diabetes</u> ?                                                                                                                                           |                      |                    |                      |                     |
| 27. Utilize and interpret continuous glucose monitoring (CGM) data in <u>Type 1 Diabetes</u> ?                                                                                                                                                               |                      |                    |                      |                     |
| 28. Manage <u>Type 1 Diabetes</u> patients treated with insulin pumps including insulin adjustments?                                                                                                                                                         |                      |                    |                      |                     |
| 29. Identify depression using validated scales and recommend evidence-based depression treatment in my patients with <u>Type 1 Diabetes</u> ?                                                                                                                |                      |                    |                      |                     |
| 30. Serve as a <u>Type 1 Diabetes</u> resource for other providers in my community?                                                                                                                                                                          |                      |                    |                      |                     |
